# Supplementary material for: Simultaneous Optimization of Carrier Concentration and Alloy Scattering for Ultrahigh Performance GeTe Thermoelectrics
Source: PubMed Central journal article supplement (PMC5737105; doi:10.1002/advs.201700341), 2017-09-30
Supplement: ADVS-4-na-s001.pdf [file ADVS-4-na-s001.pdf]

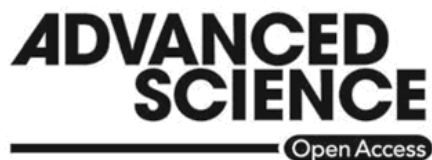

## Supporting Information

for *Adv. Sci.*, DOI: 10.1002/adv.201700341

Simultaneous Optimization of Carrier Concentration  
and Alloy Scattering for Ultrahigh Performance GeTe  
Thermoelectrics

*Juan Li, Zhiwei Chen, Xinyue Zhang, Hulei Yu, Zihua Wu,  
Huaqing Xie, Yue Chen, and Yanzhong Pei\**

# Supplementary

## Simultaneous optimization of carrier concentration and alloy scattering for ultrahigh performance GeTe thermoelectrics

Juan Li<sup>1</sup>, Zhiwei Chen<sup>1</sup>, Xinyue Zhang<sup>1</sup>, Hulei Yu<sup>2</sup>, Zihua Wu<sup>3</sup>, Huaqing Xie<sup>3</sup>, Yue Chen<sup>2</sup>, and Yanzhong Pei<sup>1\*</sup>

<sup>1</sup>Interdisciplinary Materials Research Center, School of Materials Science and Engineering, Tongji Univ., 4800 Caoan Rd., Shanghai 201804, China.

<sup>2</sup>Department of Mechanical Engineering, The University of Hong Kong, Pokfulam Road, Hong Kong SAR, China

<sup>3</sup>School of Environmental and Materials Engineering, Shanghai Second Polytechnic Univ., 2360 Jinhai Rd., Shanghai, 201209, China,

\*Email: [yanzhong@tongji.edu.cn](mailto:yanzhong@tongji.edu.cn)

### Calculation of the formation energy of point defects:

The point defect formation energies in GeTe were calculated according to<sup>1</sup>:

$$E_f = E(\text{Ge}_{64-x}\text{Te}_{64-y}) - E(\text{Ge}_{64}\text{Te}_{64}) + x\mu(\text{Ge}) + y\mu(\text{Te}),$$

where  $E(\text{Ge}_{64-x}\text{Te}_{64-y})$  and  $E(\text{Ge}_{64}\text{Te}_{64})$  represent the total energies of a defective and a perfect supercell, respectively.  $\mu$  denotes the chemical potential of an element in its bulk phase. The formation energies of a Ge vacancy in GeTe-PbSe alloys were calculated using the following equation:

$$E_f^{\text{VGe}} = E(\text{Ge}_{63-x}\text{Pb}_x\text{Te}_{64-x}\text{Se}_x) - E(\text{Ge}_{64-x}\text{Pb}_x\text{Te}_{64-x}\text{Se}_x) + \mu(\text{Ge}).$$

It is seen from Fig. 4 that alloying GeTe with PbSe increases the Ge vacancy formation energy; i.e., Ge vacancy becomes more difficult to form in GeTe-PbSe alloys, which is in agreement with the experimentally observed decrease of hole carrier concentration.

**Supplementary Table 1.** The composition, Hall carrier concentration, inertial effective mass, plasma frequency, the corresponding energy and the density of samples.

| Composition<br>(GeTe) <sub>1-x</sub> (PbSe) <sub>x</sub> | Carrier<br>concentration<br>(10 <sup>20</sup> cm <sup>-3</sup> ) | Inertial Effective<br>Mass (m <sub>e</sub> ) | Plasma frequency<br>(10 <sup>14</sup> Hz) | Plasma energy<br>(eV) | Density<br>(g/cm <sup>3</sup> ) |
|----------------------------------------------------------|------------------------------------------------------------------|----------------------------------------------|-------------------------------------------|-----------------------|---------------------------------|
| x=0                                                      | 7.8                                                              | 0.22                                         | 7.43                                      | 0.489                 | 6.21                            |
| x=0.05                                                   | 6.7                                                              | 0.24                                         | 6.63                                      | 0.436                 | 6.39                            |
| x=0.1                                                    | 5.5                                                              | 0.20                                         | 6.25                                      | 0.411                 | 6.20                            |
| x=0.15                                                   | 3.8                                                              | 0.24                                         | 4.82                                      | 0.317                 | 6.47                            |
| x=0.2                                                    | 2.7                                                              | 0.21                                         | 4.37                                      | 0.287                 | 6.53                            |
| x=0.23                                                   | 2.3                                                              | 0.20                                         | 4.14                                      | 0.273                 | 6.66                            |
| x=0.25                                                   | 2.1                                                              | 0.21                                         | 3.92                                      | 0.258                 | 6.42                            |
| x=0.27                                                   | 2.0                                                              | 0.25                                         | 3.46                                      | 0.228                 | 6.34                            |
| x=0.3                                                    | 1.8                                                              | 0.29                                         | 2.73                                      | 0.180                 | 6.49                            |
| x=0.35                                                   | 1.1                                                              | 0.25                                         | 2.56                                      | 0.169                 | 6.59                            |
| x=0.4                                                    | 0.7                                                              | 0.30                                         | 1.81                                      | 0.119                 | 6.3                             |
|                                                          | 3.0                                                              | 0.21                                         |                                           |                       |                                 |
| GeTe                                                     | 3.5                                                              | 0.23                                         |                                           | Ref. <sup>[1]</sup>   |                                 |
|                                                          | 5.0                                                              | 0.28                                         |                                           |                       |                                 |

# Supplementary

## Debye Model:

The temperature-dependent lattice thermal conductivity can be estimated with the following equation<sup>3</sup>:

$$\kappa_L = \frac{k_B}{2\pi^2\nu} \left(\frac{k_B T}{\hbar}\right)^3 \int_0^{\theta_D/T} \tau_{tot}(x) \frac{x^4 e^{-x}}{(e^x - 1)^2} dx \quad (1)$$

Where  $k_B$  is the Boltzman constant,  $\nu$  is average sound velocity,  $\hbar$  is the reduced Plank constant,  $\theta_D$  is Debye temperature,  $\tau_{tot}$  is the total relaxation time and  $x = \hbar\omega/k_B T$ .

For (GeTe)<sub>1-x</sub>(PbSe)<sub>x</sub> solid solutions, the total relaxation time includes the contributions from phonon-phonon, point defect and dislocation scattering respectively by:

$$\tau_{tot}^{-1} = \tau_U^{-1} + \tau_N^{-1} + \tau_{PD}^{-1} \quad (2)$$

$$\tau_U^{-1} = \frac{2}{(6\pi^2)^{1/3}} \frac{k_B \bar{V}^{1/3} \gamma^2 \omega^2 T}{\bar{M} \nu^3} \quad (3)$$

$$\tau_N^{-1} = \frac{2}{(6\pi^2)^{1/3}} \frac{k_B \bar{V}^{1/3} \gamma^2 \omega^2 T}{\bar{M} \nu^3} \quad (4)$$

$$\tau_{PD}^{-1} = \frac{\bar{V} \omega^4}{4\pi \nu^3} \sum_i x_i (1 - x_i) \left[ \left(\frac{M_i - M}{M}\right)^2 + \varepsilon \left(\frac{a_i - a}{a}\right)^2 \right] \quad (5)$$

The anharmonic parameter  $\varepsilon$  can be estimated<sup>4-6</sup> by  $\varepsilon = \frac{2}{9} \left[ (4 + 6.4\gamma) \frac{1+\nu}{1-\nu} \right]^2$ , Poisson's ratio<sup>7</sup>  $\nu = \frac{\nu_L^2 - 2\nu_T^2}{2(\nu_L^2 - \nu_T^2)}$

**Supplementary Table 2.** Parameters used for the Debye model.

| Parameters      | Description                                                        | Values                                                                                                        | Ref.      |
|-----------------|--------------------------------------------------------------------|---------------------------------------------------------------------------------------------------------------|-----------|
| $\beta$         | Ratio of N- to U-process                                           | 0.52                                                                                                          | estimated |
| $\bar{V}$       | Average atomic volume of (GeTe) <sub>1-x</sub> (PbSe) <sub>x</sub> | $a_i^3 \sin \alpha_i \sqrt{1 - \frac{2 \cos^2 \alpha_i}{\cos \alpha_i + 1}} / 8 \text{ m}^3$                  | This work |
| $\bar{M}$       | Average atomic mass of (GeTe) <sub>1-x</sub> (PbSe) <sub>x</sub>   | $M_{(\text{GeTe})_{1-x}(\text{PbSe})_x} / (2 \times 6.023 \times 10^{23}) \text{ kg}$                         | -         |
| $x_i$           | Impurity concentration in solid solutions                          | $x_{\text{PbSe}} \leq 0.4$                                                                                    | -         |
| $\nu$           | Average sound speed                                                | 2030.2-954.87 $x_i$                                                                                           | This work |
| $\nu_L$         | Longitudinal sound speed                                           | 3358.6-1689.7 $x_i$                                                                                           | This work |
| $\nu_T$         | Transverse sound speed                                             | 1908.8-954.87 $x_i$                                                                                           | This work |
| $\gamma$        | Gruneisen parameter                                                | 2.19                                                                                                          | 8         |
| $M_i$           | Atomic mass of impurity                                            | $M_{\text{Pb}}=207.2 \text{ g} \cdot \text{mol}^{-1}$ , $M_{\text{Se}}=78.96 \text{ g} \cdot \text{mol}^{-1}$ | -         |
| $M$             | Atomic mass of matrix                                              | $M_{\text{Ge}}=72.64 \text{ g} \cdot \text{mol}^{-1}$ , $M_{\text{Te}}=127.6 \text{ g} \cdot \text{mol}^{-1}$ | -         |
| $a_i, \alpha_i$ | Lattice parameter of (GeTe) <sub>1-x</sub> (PbSe) <sub>x</sub>     | $a_i=0.21773x_i+5.98307 \text{ \AA}$<br>$\alpha_i=88.1896+0.1458x_i+2.8061x_i^2+5.0480x_i^3 \text{ (deg.)}$   | This work |

### Supplementary references:

1. Yue Chen, Jia-Xiang Shang and Y. Zhang, *Intermetallics*, 2007, **15**, 1558-1563.
2. J. E. Lewis, *Phys. Stat. Sol. (b)*, 1973, **59**, 367-377.
3. J. Callaway and H. C. Vonbaeyer, *Phys Rev*, 1960, **120**, 1149-1154.
4. B. Abeles, *Phys Rev*, 1963, **131**, 1906-1911.
5. P. G. Klemens, *Proceedings of the Physical Society*, 1955, **A68**, 1113-1128.
6. Y. Gelbstein, O. Ben-Yehuda, Z. Dashevsky and M. P. Dariel, *J. Cryst. Growth*, 2009, **311**, 4289-4292.
7. D. J. Singh, *J. Appl. Phys.*, 2013, **113**, 203101.
8. Yaniv Gelbstein, Joseph Davidow, Ehud Leshem, Oren Pinshow and S. Moisa, *Phys. Status Solidi B*, 2014, **251**, 1431-1437.
